# Supplementary material
Source: MDPI journal article supplement (https://www.mdpi.com/2073-4352/13/2/312)
Supplement: s1 [file s1]

# Supplementary Materials

## Designing Black Phosphorus and Heptazine-Based Crystalline Carbon Nitride Composites for Photocatalytic Water Splitting

Zijie Xiao <sup>1</sup>, Yayun Wang <sup>1</sup>, Hui Chen <sup>1</sup>, Haotian Wang <sup>1</sup>, Yuke Li <sup>2</sup>, Yilin Chen <sup>1,\*</sup>, and Yun Zheng <sup>1,\*</sup>

<sup>1</sup> Xiamen Key Laboratory of Optoelectronic Materials and Advanced Manufacturing, College of Materials Science and Engineering, Huaqiao University, Xiamen 361021, China

<sup>2</sup> Department of Chemistry and Centre for Scientific Modeling and Computation, Chinese University of Hong Kong, Hong Kong, China

\* Correspondence: ylchen@hqu.edu.cn (Y.C); zheng-yun@hqu.edu.cn (Y.Z.)

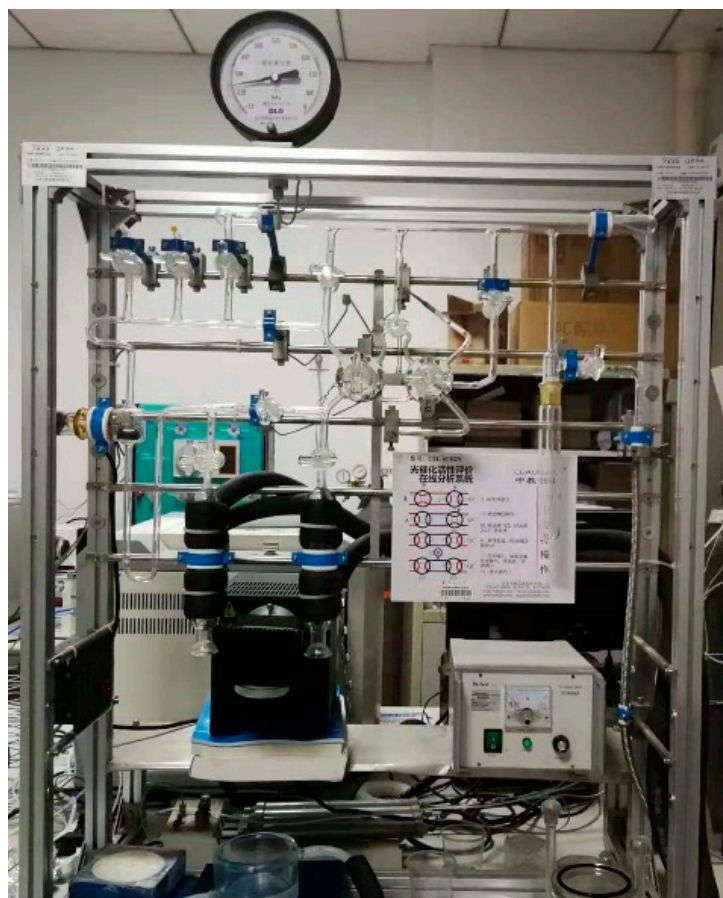

**Figure S1.** Photocatalytic hydrogen production equipment (CEL-SPH2N system).

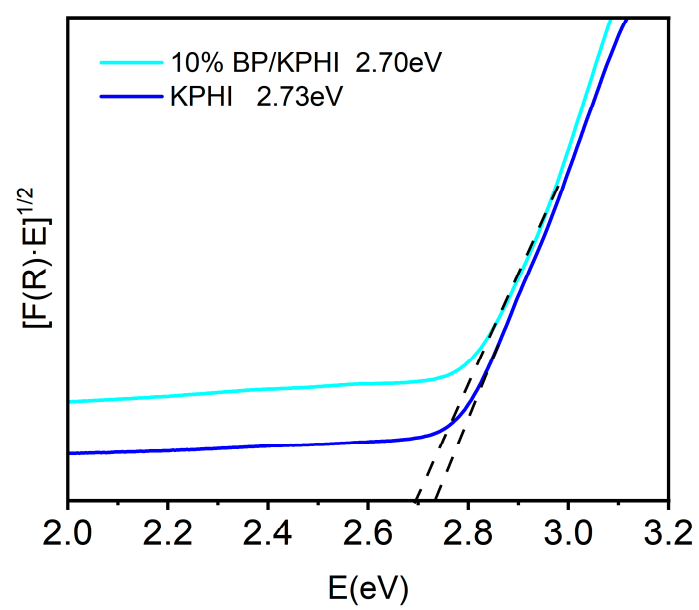

**Figure S2.** Band gap energies of KPHI and 10% BP/KPHI.

**Table S1**

Analysis result of EDS spectrum from 10% BP/KPHI

| Z  | Element | Family | Atomic Fraction(%) | Atomic Error(%) | Mass Fraction(%) | Mass Error (%) | Fit error (%) |
|----|---------|--------|--------------------|-----------------|------------------|----------------|---------------|
| 6  | C       | K      | 84.52              | 5.39            | 5.39             | 3.29           | 2.19          |
| 7  | N       | K      | 10.7               | 2.32            | 11.41            | 2.41           | 5.78          |
| 15 | P       | K      | 4.78               | 0.97            | 11.27            | 2.23           | 4.2           |

**Table S2**

Photocatalytic hydrogen production rate in the no-treatment control group

| Entry | Removed component                    | H <sub>2</sub> production rate [mmol g <sup>-1</sup> h <sup>-1</sup> ] |
|-------|--------------------------------------|------------------------------------------------------------------------|
| 1     | None                                 | 4.3 ± 0.1                                                              |
| 2     | No H <sub>2</sub> PtCl <sub>6</sub>  | 0.03 ± 0.01                                                            |
| 3     | No methanol                          | < 0.01                                                                 |
| 4     | No H <sub>2</sub> O                  | < 0.01                                                                 |
| 5     | No light                             | < 0.01                                                                 |
| 6     | Changing methanol to triethanolamine | 3.1 ± 0.1                                                              |

**Table S3**

Summary of the photocatalytic activities of BP-based photocatalysts for H<sub>2</sub> evolution.

| Photocatalyst                                        | Cocatalyst | Sacrificial agent                                 | Light source                                              | HER ( $\mu\text{mol h}^{-1}$ ) | Ref.      |
|------------------------------------------------------|------------|---------------------------------------------------|-----------------------------------------------------------|--------------------------------|-----------|
| BP/KPHI                                              | Pt         | Methanol                                          | Xe, 300 W, > 420 nm                                       | 215                            | This work |
| BP-BM                                                | -          | Na <sub>2</sub> S/Na <sub>2</sub> SO <sub>3</sub> | Xe, 300 W, > 420 nm                                       | 2.6                            | [1]       |
| BP nanosheets                                        | -          | Methanol                                          | Xe, 300 W, > 420 nm                                       | 0.37                           | [2]       |
| BP/TiO <sub>2</sub> mesocrystal                      | Pt         | Methanol                                          | Asahi Spectra Hal-320, 200 mW cm <sup>-2</sup> , > 420 nm | 1.9                            | [3]       |
| CoP/BP                                               | -          | Oxalic acid                                       | Xe, 300 W, > 420 nm                                       | 1.4                            | [4]       |
| BP/CN                                                | -          | Methanol                                          | Xe, 300 W, > 420 nm                                       | 0.6                            | [5]       |
| BP/CN                                                | -          | Isopropanol                                       | LED, 440-445 nm                                           | 1.57                           | [6]       |
| BP/Pt/RGO                                            | -          | EDTA                                              | Xe, 320 W, > 420 nm                                       | 1.3                            | [7]       |
| BP-Au/La <sub>2</sub> Ti <sub>2</sub> O <sub>7</sub> | -          | Methanol                                          | Xe, 320 W, > 420 nm                                       | 1.7                            | [8]       |

## References

1. Zhu, X.; Zhang, T.; Sun, Z.; Chen, H.; Guan, J.; Chen, X.; Ji, H.; Du, P.; Yang, S. Black phosphorus revisited: A missing metal-free elemental photocatalyst for visible light hydrogen evolution. *Adv. Mater.*, **2017**, 29(17):1605776.
2. Tian, B.; Tian, B.; Smith, B.; Scott, M. C.; Lei, Q.; Hua, R.; Tian, Y.; Liu, Y. Facile bottom-up synthesis of partially oxidized black phosphorus nanosheets as metal-free photocatalyst for hydrogen evolution. *Proc. Natl. Acad. Sci.*, **2018**, 115(17):4345–4350.
3. Elbanna, O.; Zhu, M.; Fujitsuka, M.; Majima, T. Black phosphorus sensitized TiO<sub>2</sub> mesocrystal photocatalyst for hydrogen evolution with visible and near-infrared light irradiation. *ACS Catal.*, **2019**, 9(4):3618–3626.
4. Liang, Q.; Shi, F.; Xiao, X.; Wu, X.; Huang, K.; Feng, S. In situ growth of CoP nanoparticles anchored on black phosphorus nanosheets for enhanced photocatalytic hydrogen production. *ChemCatChem*, **2018**, 10(10):2179–2183.
5. Zhu, M.; Kim, S.; Mao, L.; Fujitsuka, M.; Zhang, J.; Wang, X.; Majima, T. Metal-Free photocatalyst for H<sub>2</sub> evolution in visible to near-infrared region: black phosphorus/graphitic carbon nitride. *J. Am. Chem. Soc.*, **2017**, 139(37):13234–13242.
6. Wen, M.; Wang, J.; Tong, R.; Liu, D.; Huang, H.; Yu, Y.; Zhou, Z. K.; Chu, P. K.; Yu, X. F. A low-cost metal-free photocatalyst based on black phosphorus. *Adv. Sci.*, **2019**, 6(1): 1801321.
7. Zhu, M.; Osakada, Y.; Kim, S.; Fujitsuka, M.; Majima, T. Black phosphorus: a promising two dimensional visible and near-infrared-activated photocatalyst for hydrogen evolution. *Appl. Catal. B*, **2017**, 217: 285–292.
8. Zhu, M.; Cai, X.; Fujitsuka, M.; Zhang, J.; Majima, T. Au/La<sub>2</sub>Ti<sub>2</sub>O<sub>7</sub> nanostructures sensitized with black phosphorus for plasmon-enhanced photocatalytic hydrogen production in visible and near-infrared light. *Angew. Chem. Int. Ed.*, **2017**, 56(8):2064–2068.
